# Supplementary material for: Comparative studies on the inhibitory activities of selected benzoic acid derivatives against secretory phospholipase A2, a key enzyme involved in the inflammatory pathway
Source: Royal Society of Chemistry journal article supplement (doi:10.1039/c5mb00073d), 2015-04-20
Supplement: c5mb00073d2.pdf [file c5mb00073d2.pdf]

### Supplementary data

Figure a: The Line weaver-Burk plot of native PLA<sub>2</sub> and the enzyme inhibited with

GA, PCA, SA, VA and AS at 0.7 μM of concentration.

Figure b : Mode of binding of gallic acid, protcatechuic acid, syringic acid, vannilic acid and aspirin. Hydrogen bonds and their distances were also shown in the figure.
