# Supplementary figures and images for: Comparative studies on the inhibitory activities of selected benzoic acid derivatives against secretory phospholipase A2, a key enzyme involved in the inflammatory pathway
Source: Royal Society of Chemistry journal article supplement (doi:10.1039/c5mb00073d), 2015-04-20

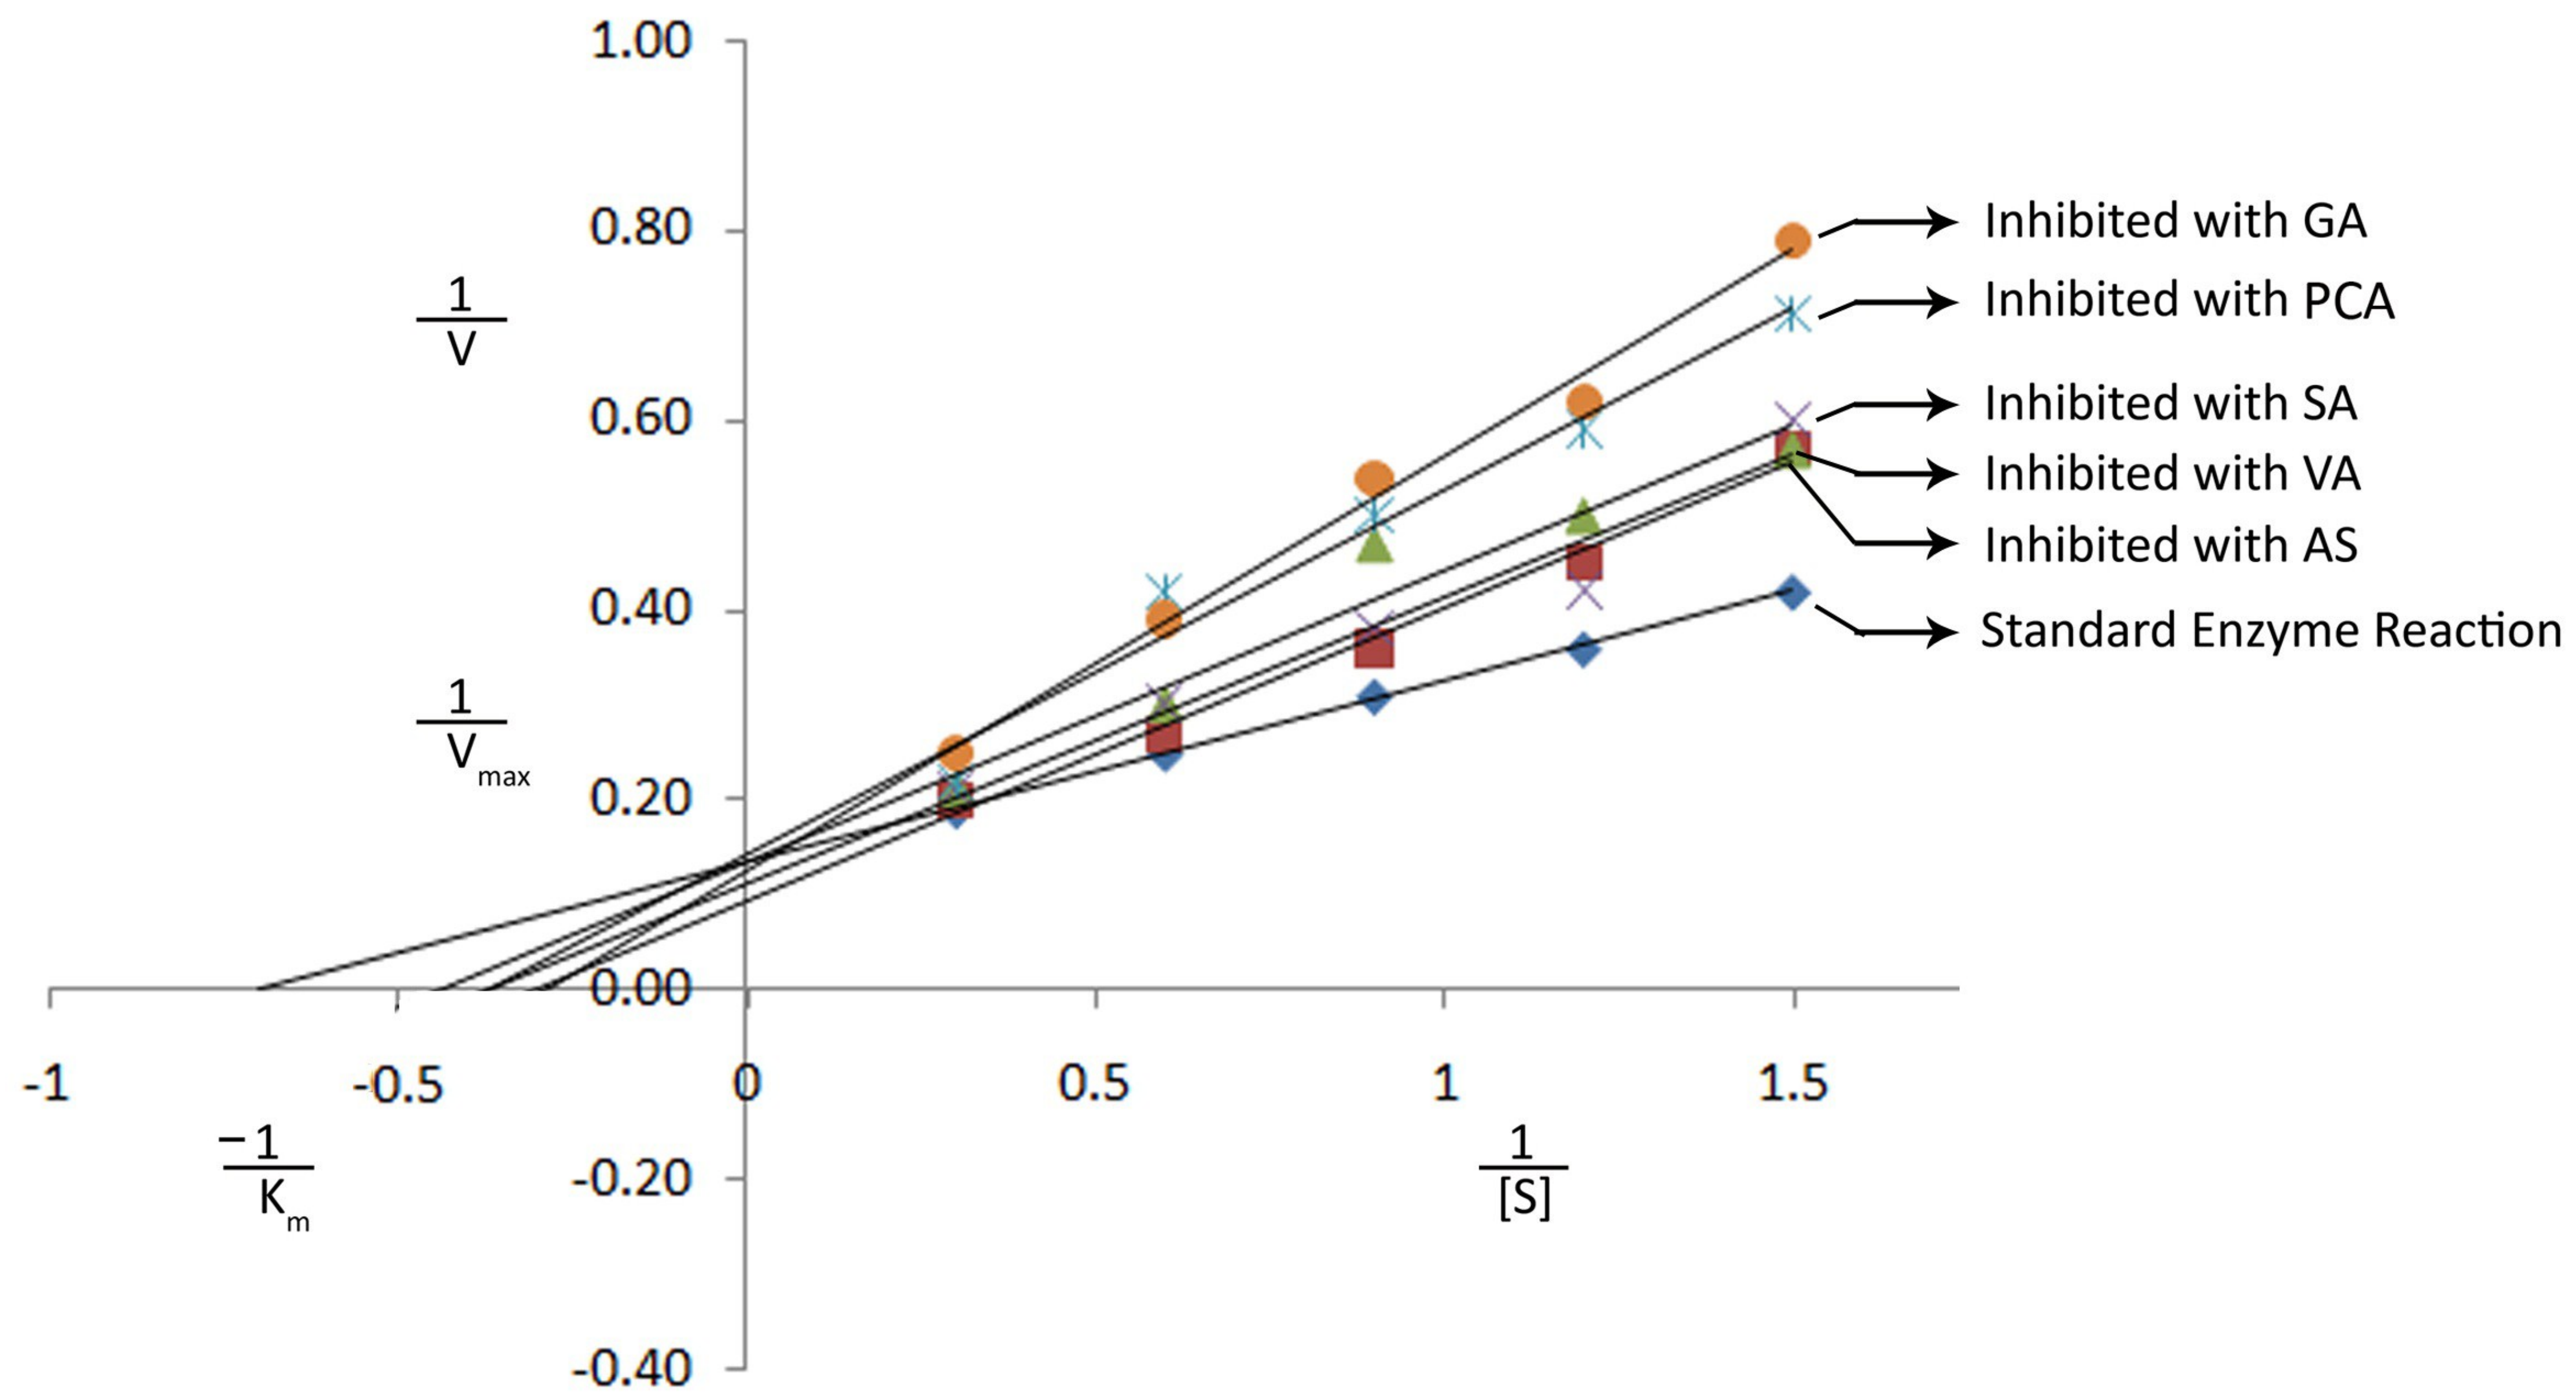

Supplement: c5mb00073d3.pdf [file c5mb00073d3.pdf]

b)

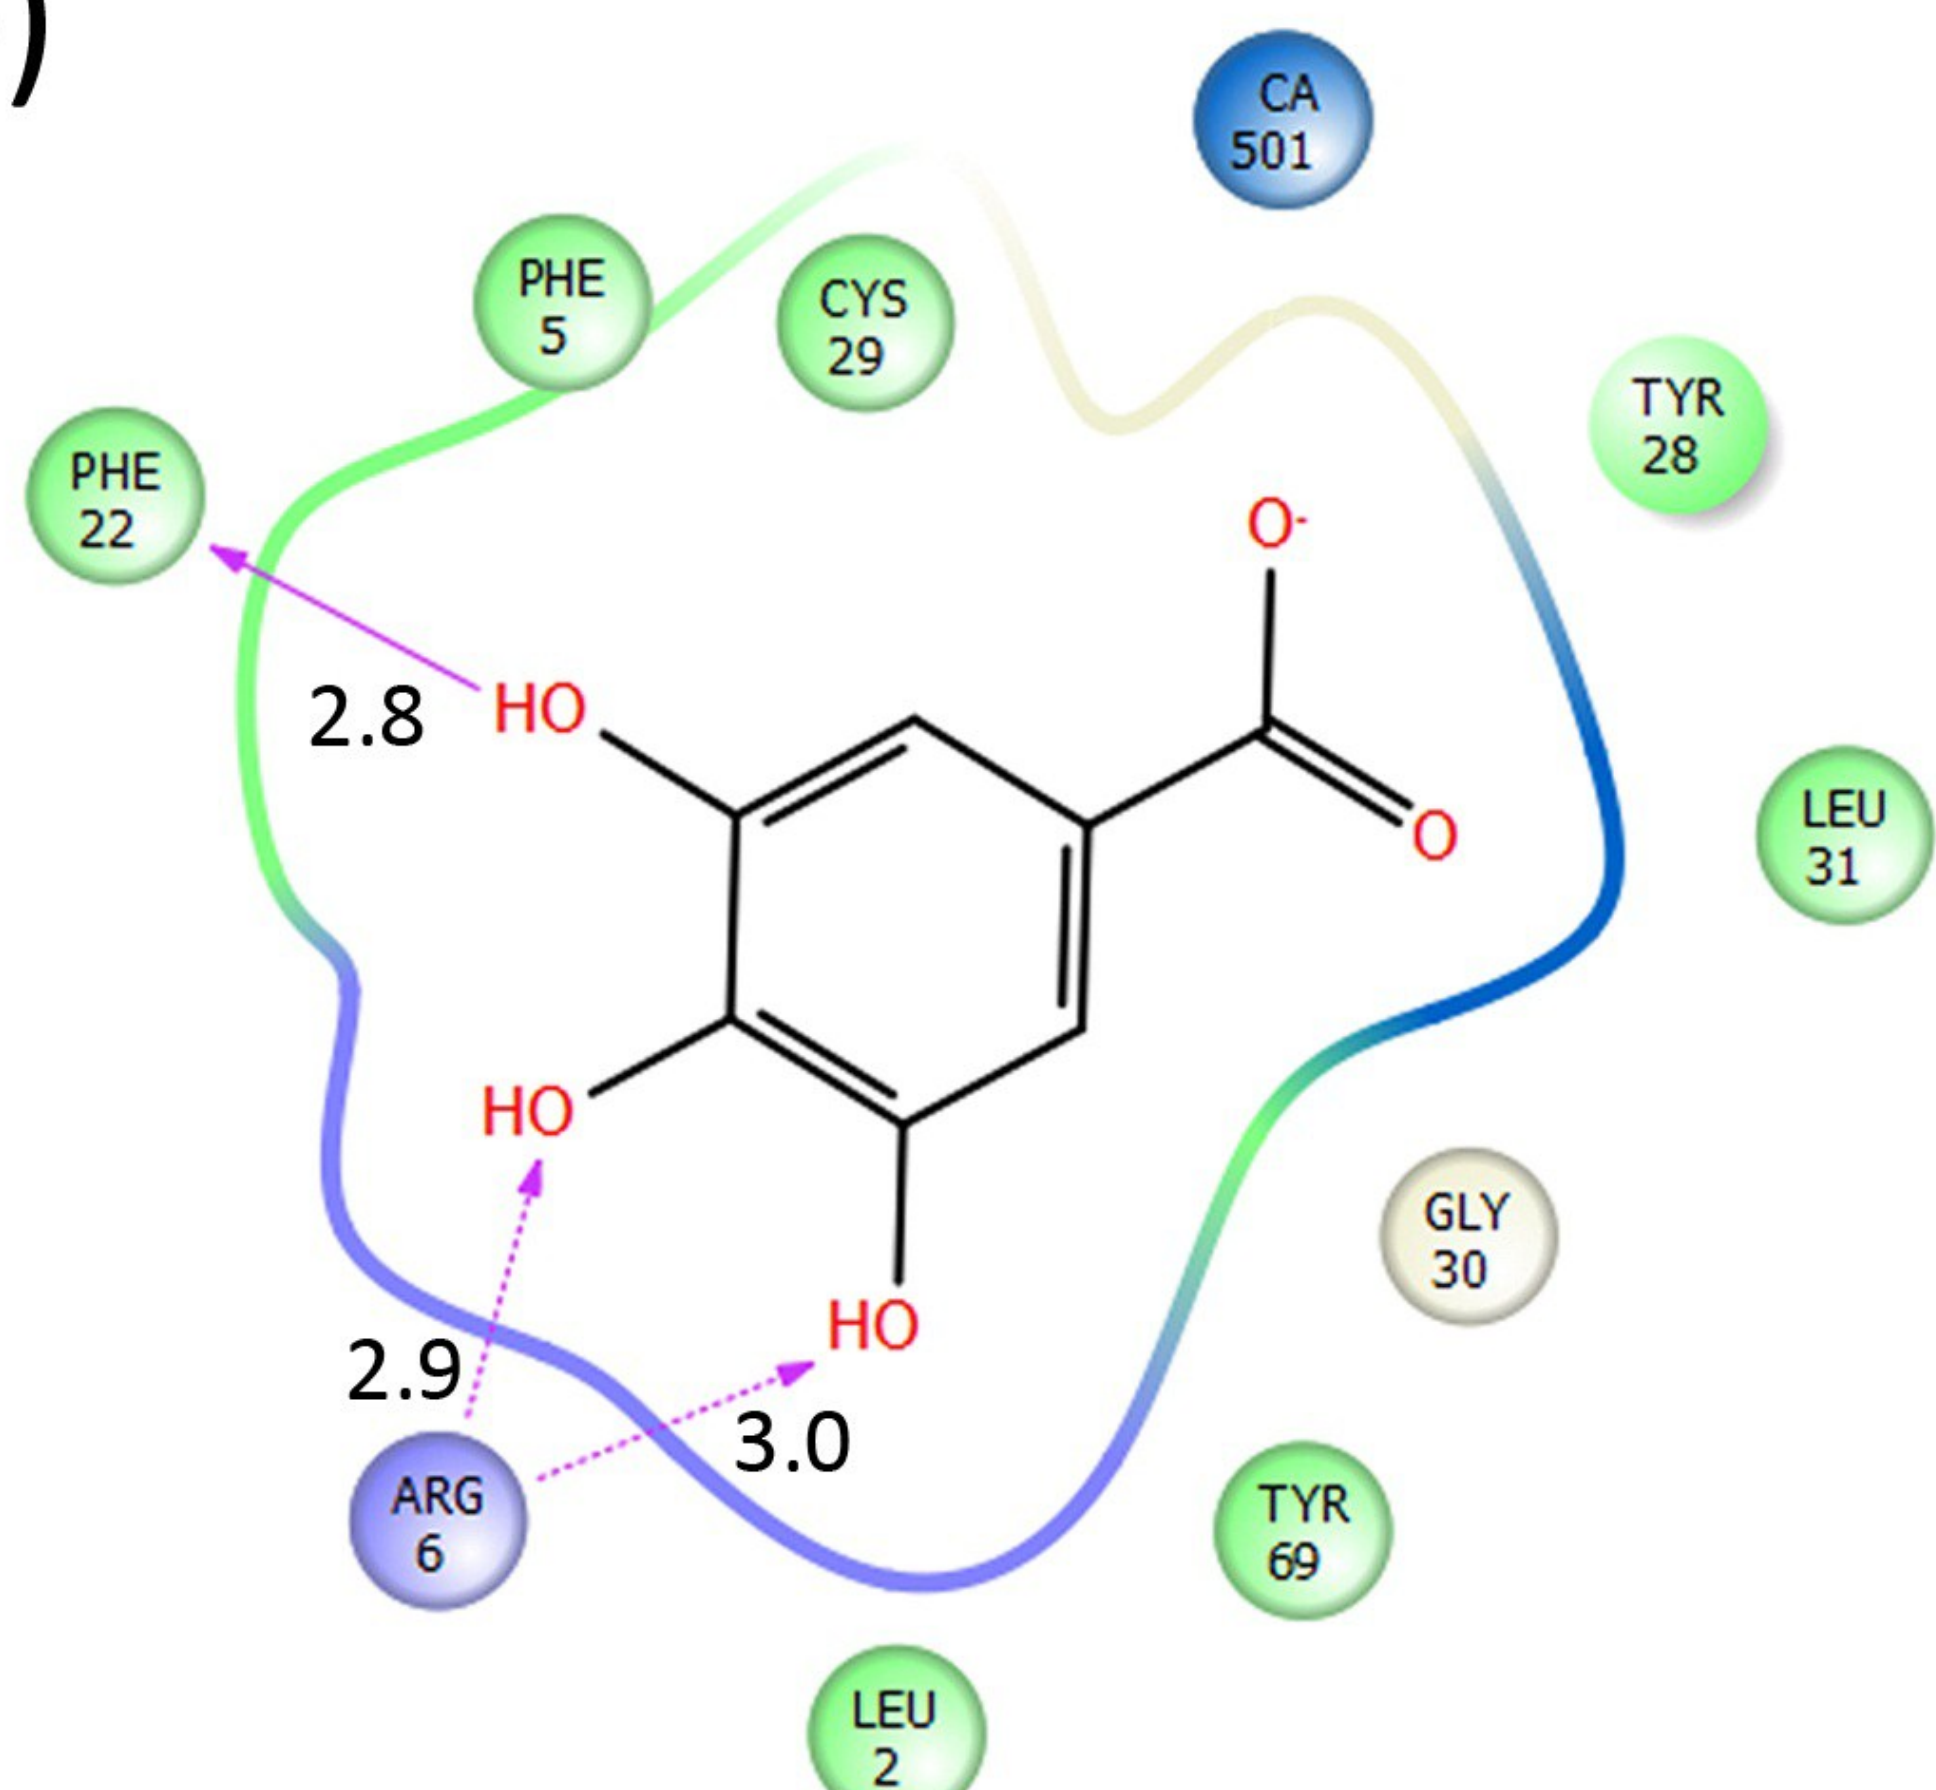

Gallic acid

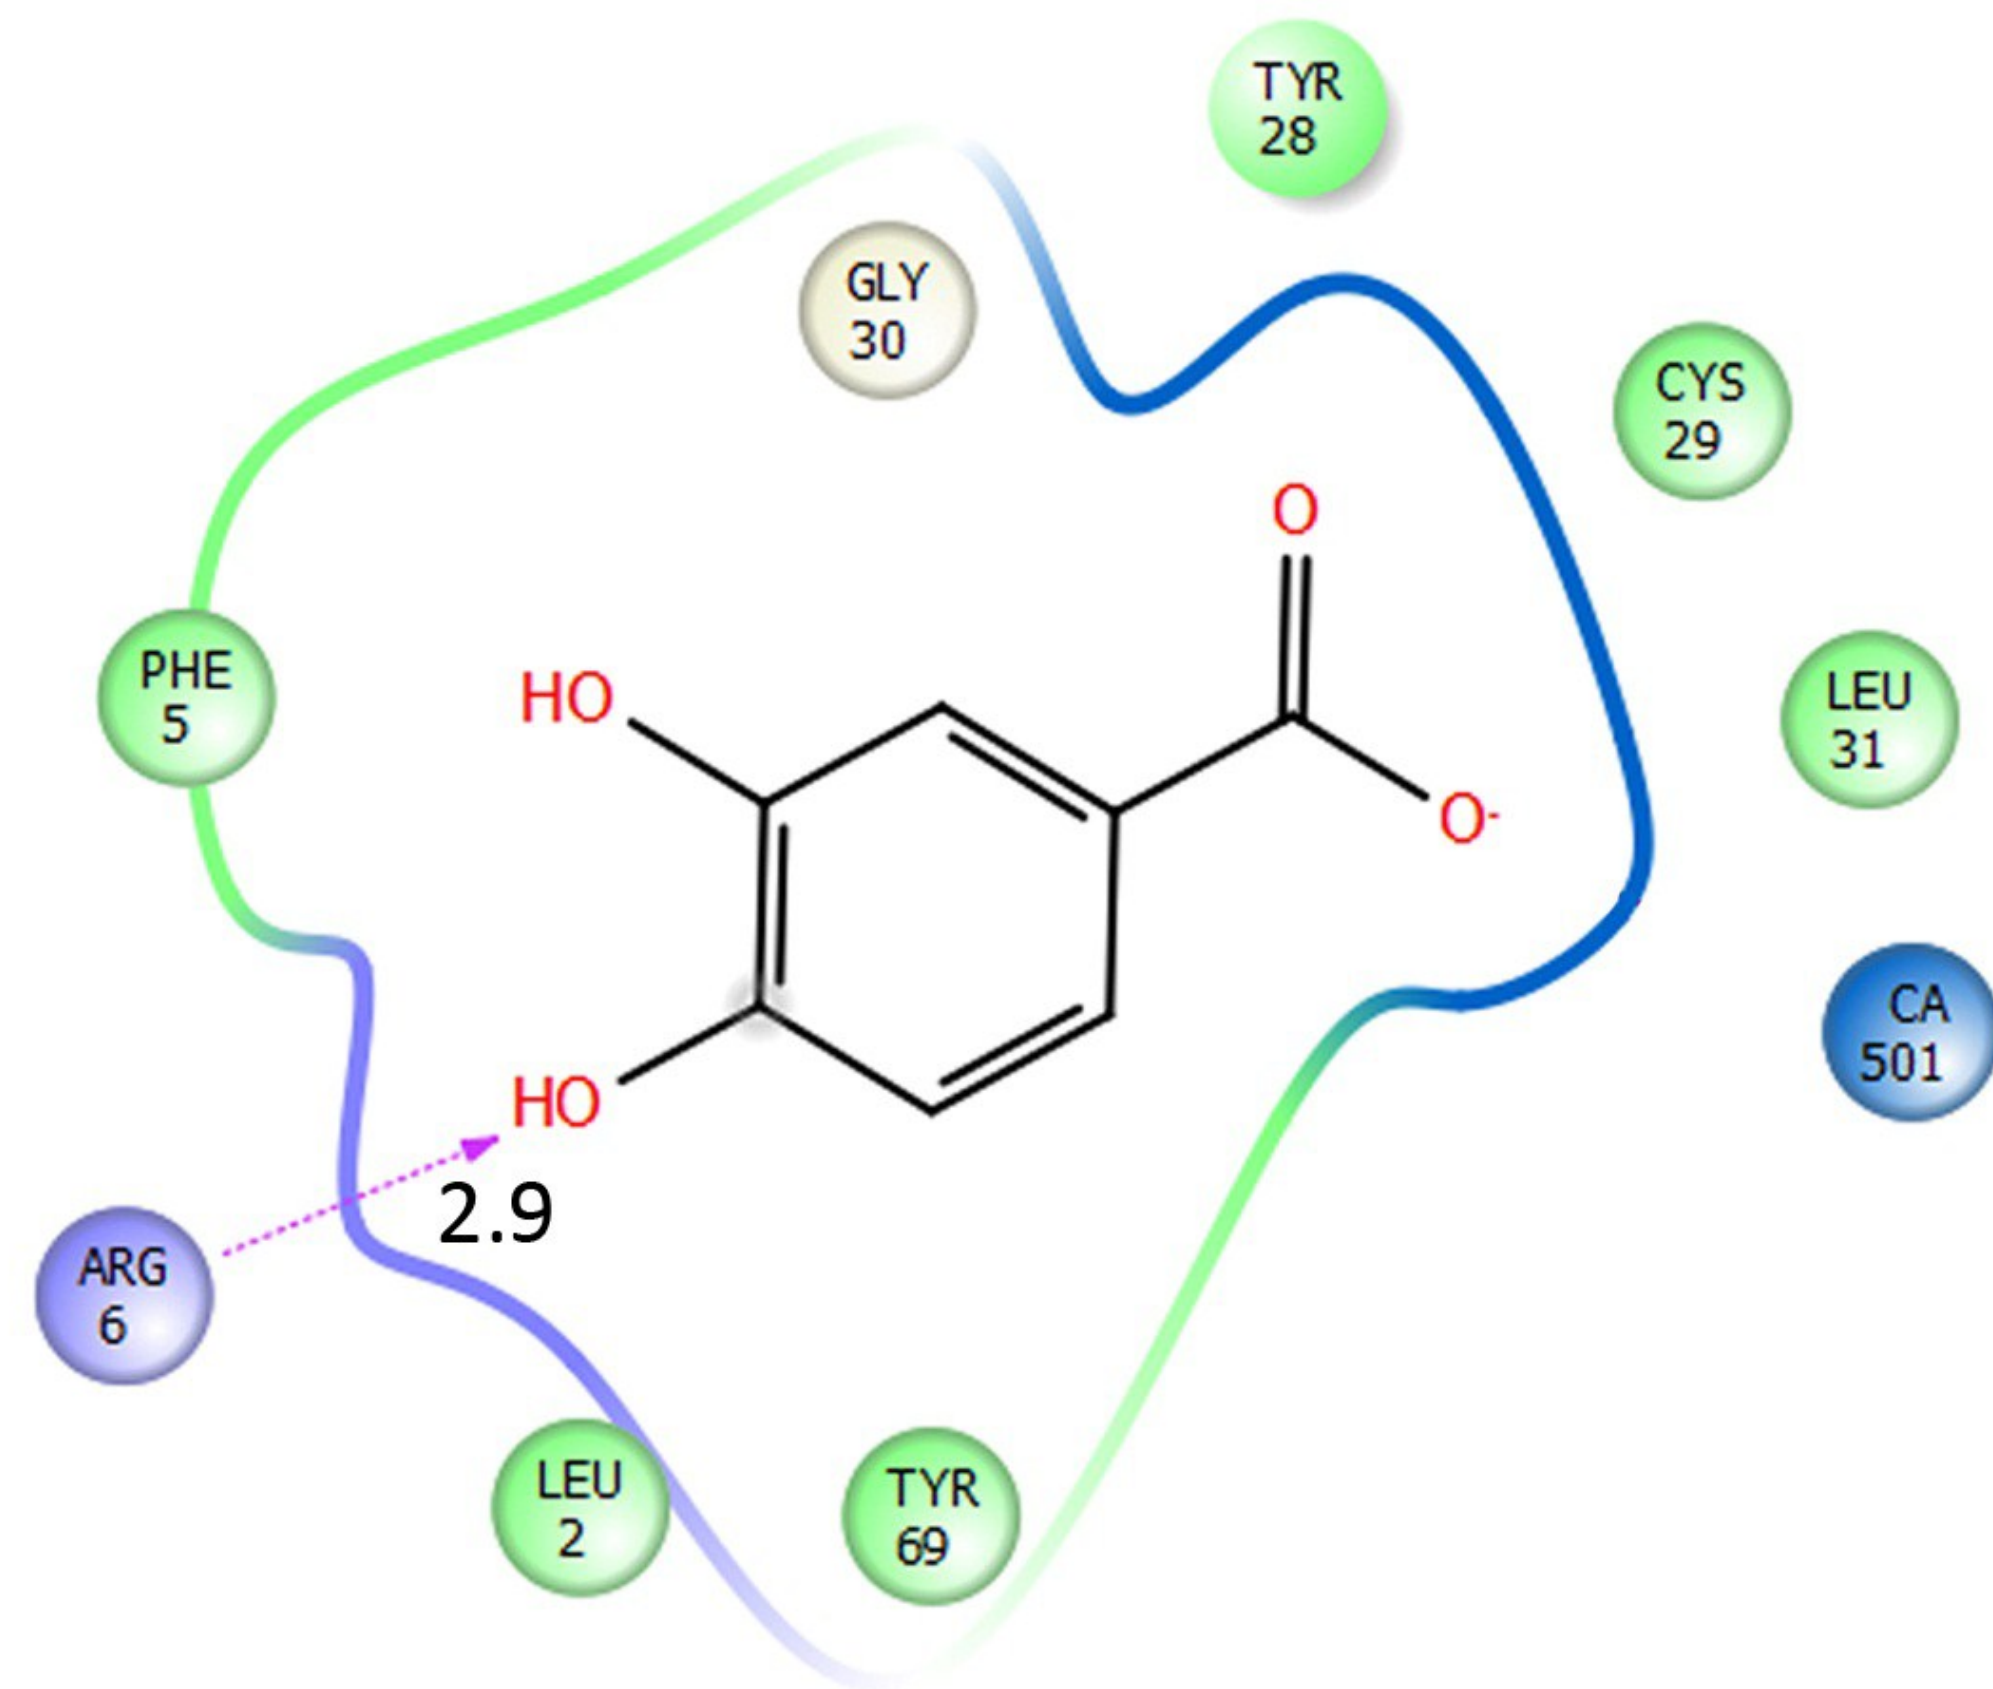

Protocatechuic acid

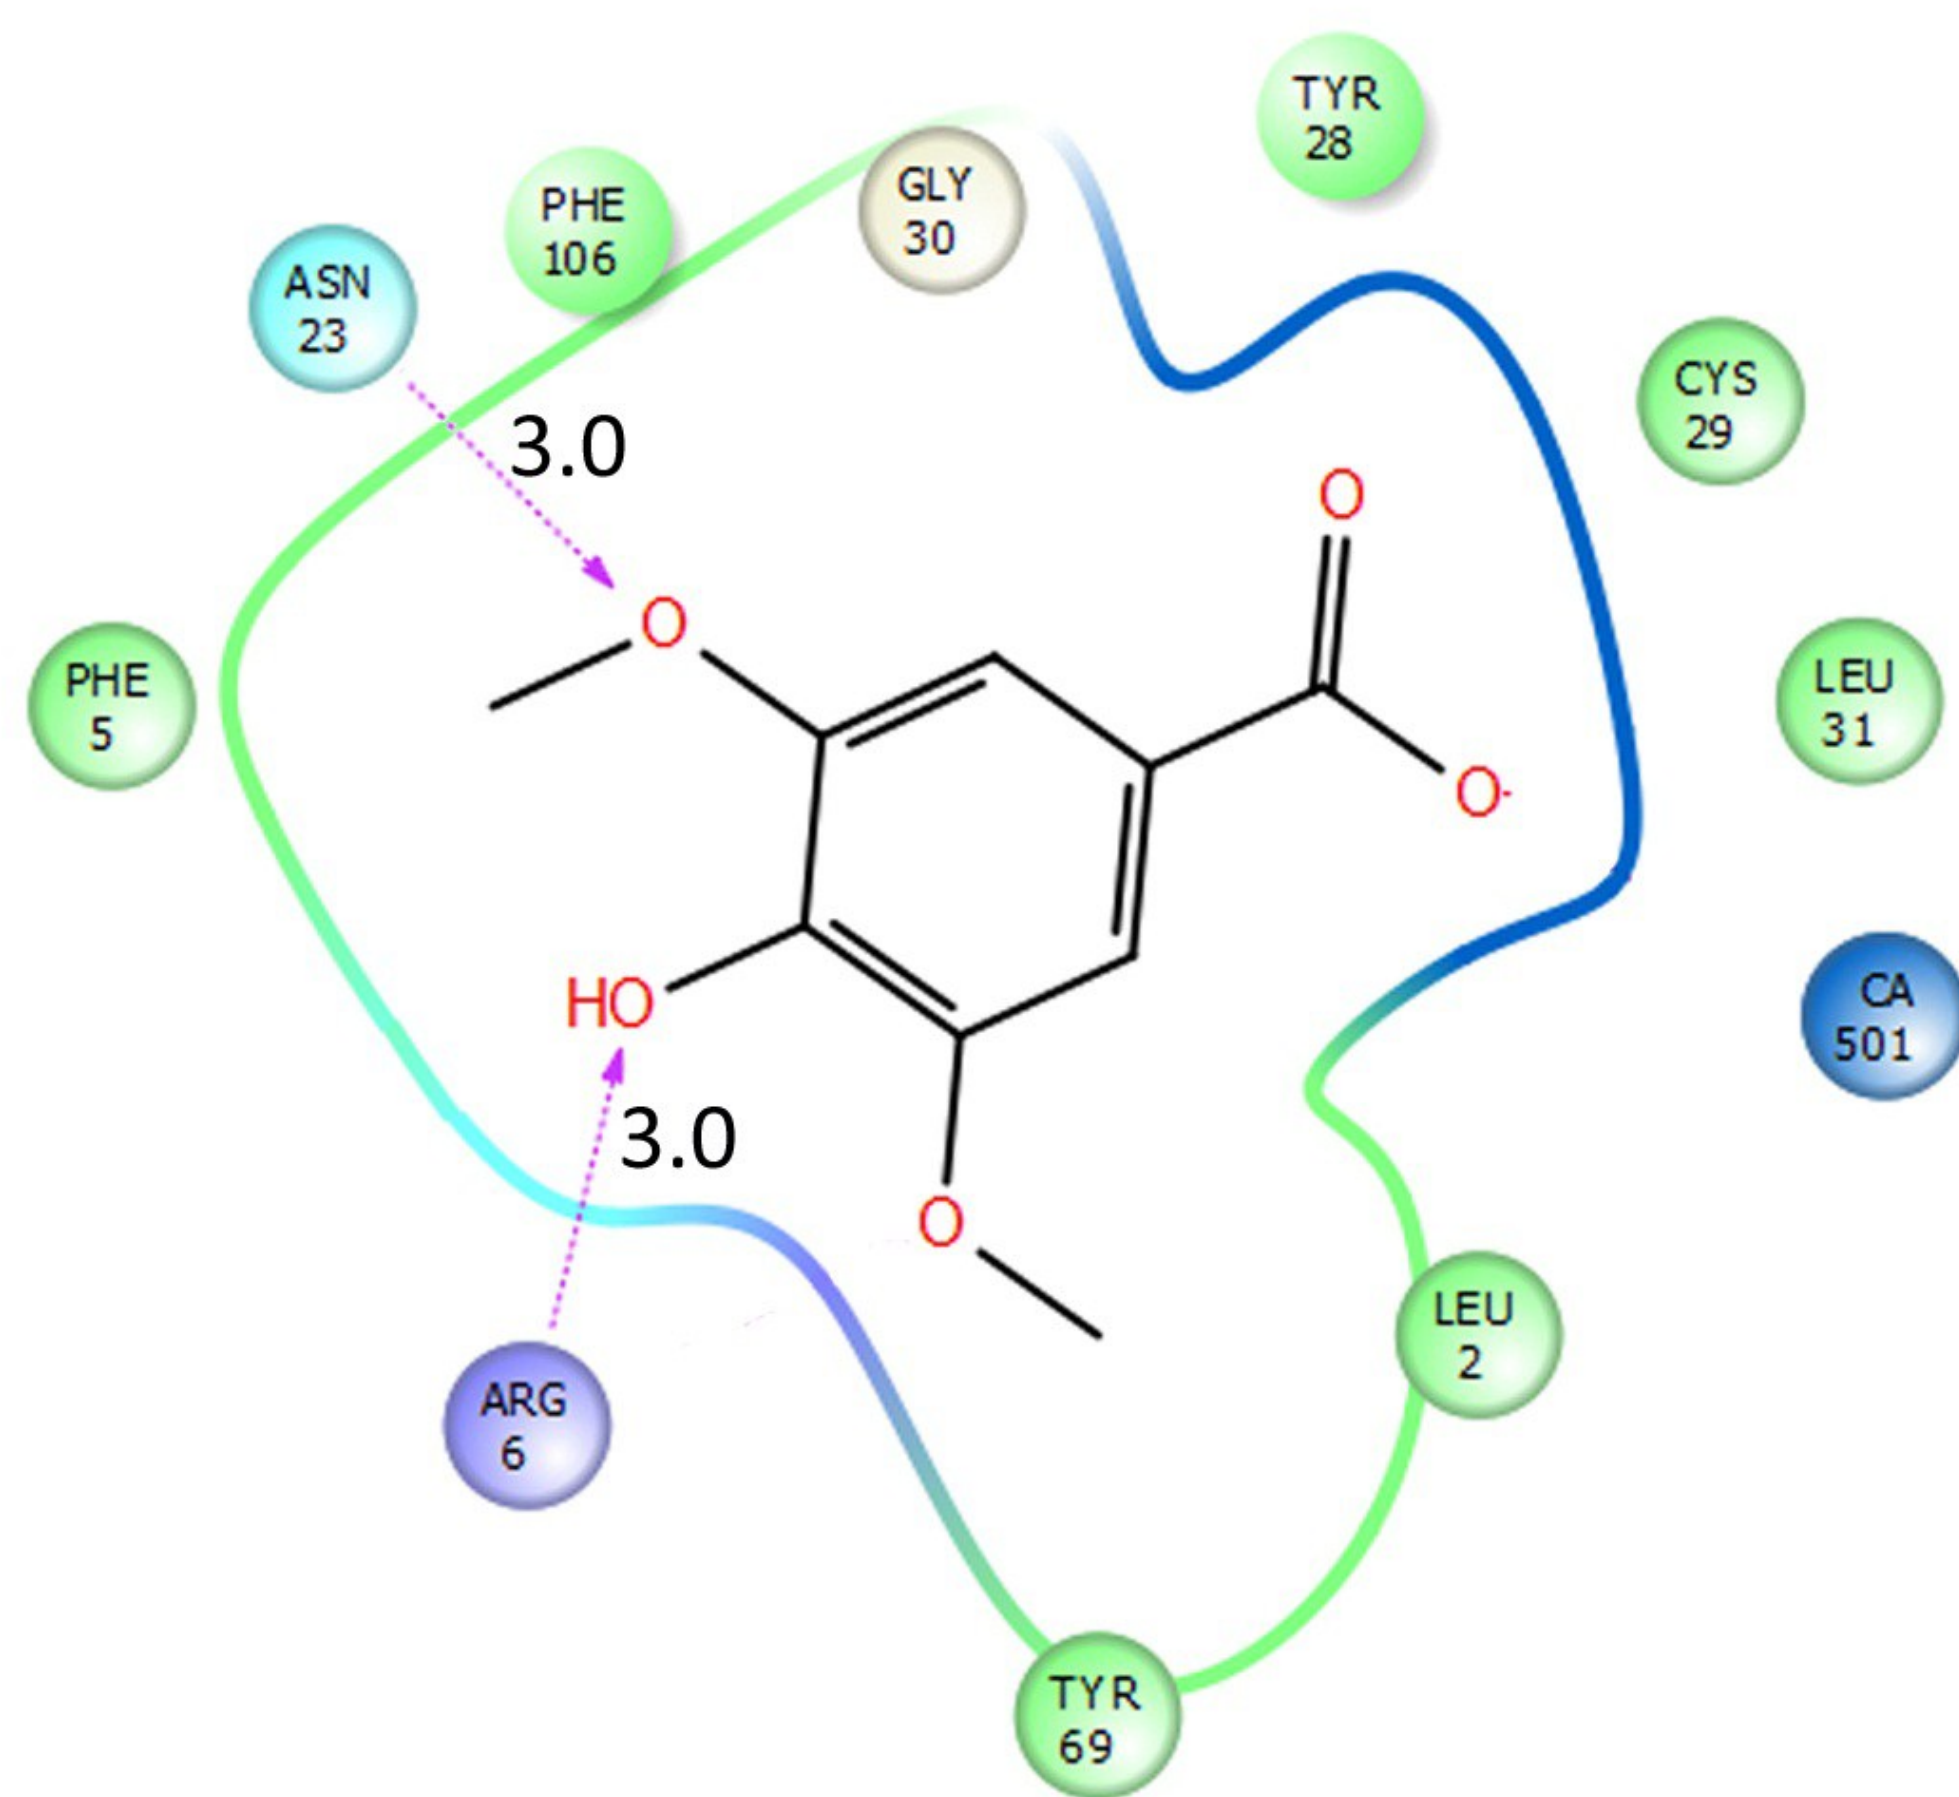

Syringic acid

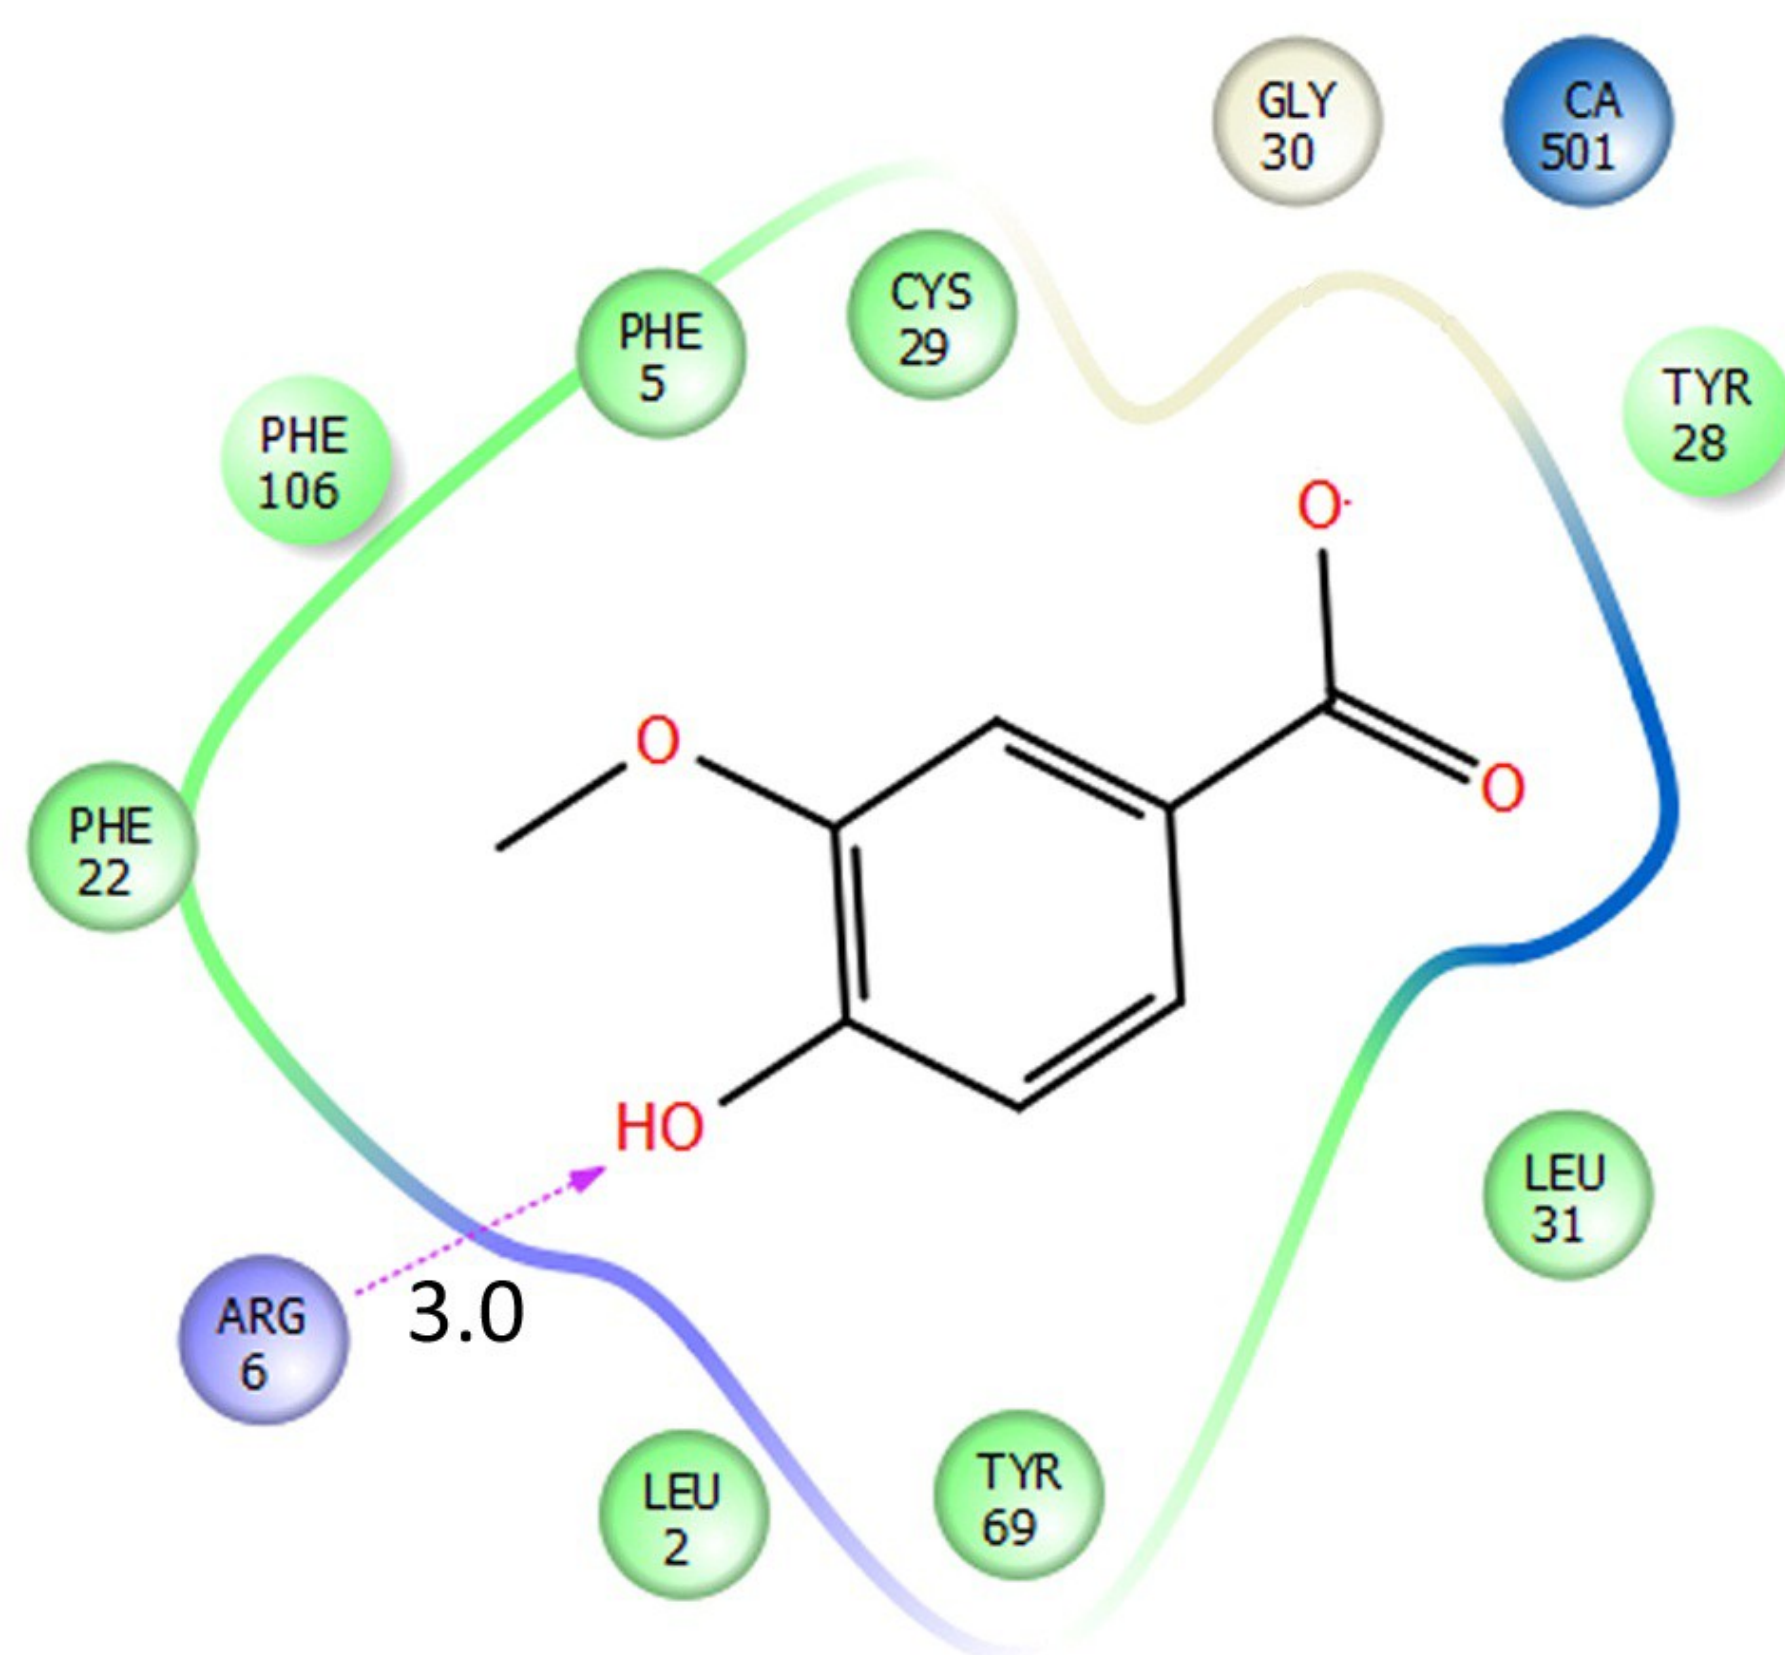

Vanillic acid

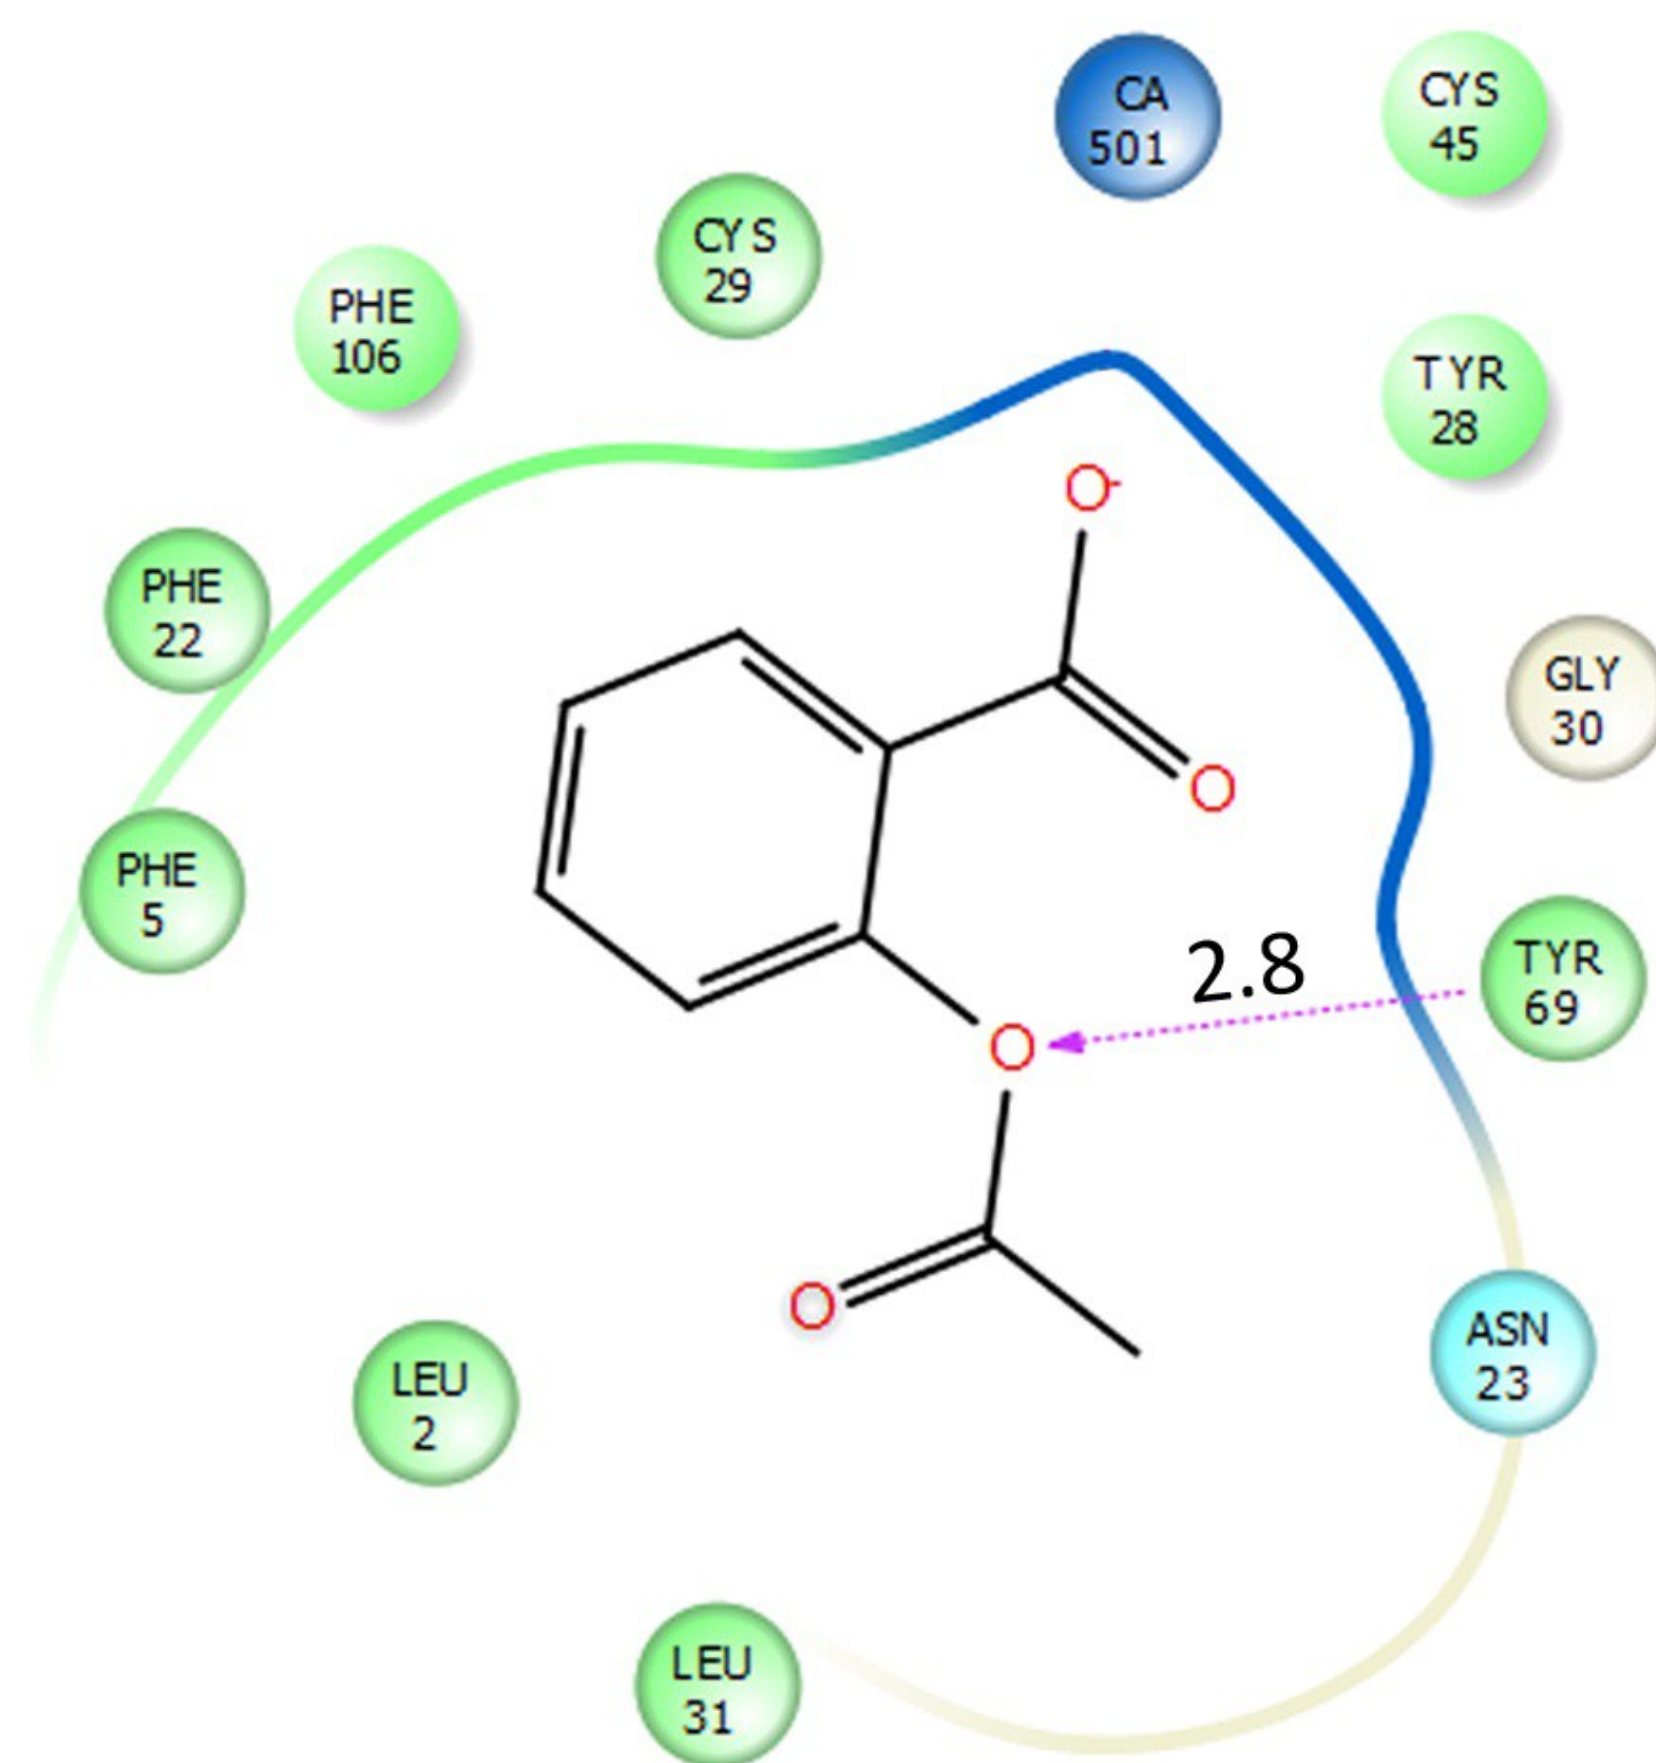

Aspirin

Supplement: c5mb00073d4.pdf [file c5mb00073d4.pdf]
